# Supplementary material
Source: MDPI journal article supplement (https://www.mdpi.com/2304-6740/10/1/11)
Supplement: s1 [file s1]

Archive with 12 entries (12 files):
- a_MoTe2_dimer_def2-TZVPPD.mol2
- b_MoSe2_def2-TZVPPD.mol2
- c_TeMoSe_SeMoTe__def2-TZVPPD.mol2
- e_MoTe2_SeMoTe_def2-TZVPPD.mol2
- f_MoTe2_TeMoS_def2-TZVPPD.mol2
- g_SMoTe_SMoTe_def2-TZVPPD.mol2
- h_SeMoS_SeMoS_def2-TZVPPD.mol2
- i_MoS2_dimer_def2-TZVPPD_MP2_geom.mol2
- MoS2_SCAN_rVV10_geometry.cif
- MoSe2_SCAN_rVV10_geometry.cif
- MoTe2_SCAN_rVV10_geometry.cif
- Ms_MoCh2_Sup Material.pdf
