# Supplementary material
Source: MDPI journal article supplement (https://www.mdpi.com/2304-6740/10/1/11)
Supplement: s1 [file s1 › a_MoTe2_dimer_def2-TZVPPD.mol2]

# test
# Created by GaussView 5.0.8
#

#
#

@<TRIPOS>MOLECULE
Molecule Name
6 4
SMALL
NO_CHARGES


@<TRIPOS>ATOM
1 Mo1     0.0000     4.1795     0.9689 Mo
2 Te2     0.0000     1.9628     0.1086 Te
3 Te3     0.0000     5.6572    -0.8912 Te
4 Mo4    -0.0000    -4.1795     0.9689 Mo
5 Te5    -0.0000    -5.6572    -0.8912 Te
6 Te6    -0.0000    -1.9628     0.1086 Te
@<TRIPOS>BOND
1 1 2 1
2 1 3 1
3 4 5 1
4 4 6 1
