# Supplementary material
Source: MDPI journal article supplement (https://www.mdpi.com/2304-6740/10/1/11)
Supplement: s1 [file s1 › b_MoSe2_def2-TZVPPD.mol2]

# test
# Created by GaussView 5.0.8
#

#
#

@<TRIPOS>MOLECULE
Molecule Name
6 4
SMALL
NO_CHARGES


@<TRIPOS>ATOM
1 Mo1    -0.0000     3.3826     0.8478 Mo
2 Se2    -0.0000     1.7345    -0.6163 Se
3 Se3    -0.0000     5.1751    -0.4310 Se
4 Mo4    -0.0000    -3.3826     0.8478 Mo
5 Se5    -0.0000    -5.1751    -0.4310 Se
6 Se6    -0.0000    -1.7345    -0.6163 Se
@<TRIPOS>BOND
1 1 2 1
2 1 3 1
3 4 5 1
4 4 6 1
