# Supplementary material
Source: MDPI journal article supplement (https://www.mdpi.com/2304-6740/10/1/11)
Supplement: s1 [file s1 › c_TeMoSe_SeMoTe__def2-TZVPPD.mol2]

# test
# Created by GaussView 5.0.8
#

#
#

@<TRIPOS>MOLECULE
Molecule Name
6 4
SMALL
NO_CHARGES


@<TRIPOS>ATOM
1 Mo1     0.0000     3.9585     0.9920 Mo
2 Se2     0.0000     1.8202     0.4643 Se
3 Te3     0.0000     5.0917    -1.1048 Te
4 Mo4     0.0000    -3.9585     0.9920 Mo
5 Te5     0.0000    -5.0917    -1.1048 Te
6 Se6     0.0000    -1.8202     0.4643 Se
@<TRIPOS>BOND
1 1 2 1
2 1 3 1
3 4 5 1
4 4 6 1
