# Supplementary material
Source: MDPI journal article supplement (https://www.mdpi.com/2304-6740/10/1/11)
Supplement: s1 [file s1 › e_MoTe2_SeMoTe_def2-TZVPPD.mol2]

# test
# Created by GaussView 5.0.8
#

#
#

@<TRIPOS>MOLECULE
Molecule Name
6 4
SMALL
NO_CHARGES


@<TRIPOS>ATOM
1 Mo1     0.7180    -4.1269     0.0000 Mo
2 Te2    -0.0000    -1.8606     0.0000 Te
3 Te3     3.0943    -4.1124     0.0000 Te
4 Mo4    -2.4719     3.5858    -0.0000 Mo
5 Te5    -0.8107     5.2957    -0.0000 Te
6 Se6    -1.3259     1.7043    -0.0000 Se
@<TRIPOS>BOND
1 1 2 1
2 1 3 1
3 4 5 1
4 4 6 1
