# Supplementary material
Source: MDPI journal article supplement (https://www.mdpi.com/2304-6740/10/1/11)
Supplement: s1 [file s1 › f_MoTe2_TeMoS_def2-TZVPPD.mol2]

# test
# Created by GaussView 5.0.8
#

#
#

@<TRIPOS>MOLECULE
Molecule Name
6 4
SMALL
NO_CHARGES


@<TRIPOS>ATOM
1 Mo1    -0.2174    -3.6145     0.0000 Mo
2 Te2     0.0000    -1.2467     0.0000 Te
3 Te3    -2.5405    -4.1102     0.0000 Te
4 Mo4     2.0174     4.7341    -0.0000 Mo
5 S5     0.4063     6.0459    -0.0000 S
6 Te6     0.9616     2.5923    -0.0000 Te
@<TRIPOS>BOND
1 1 2 1
2 1 3 1
3 4 5 1
4 4 6 1
