# Supplementary material
Source: MDPI journal article supplement (https://www.mdpi.com/2304-6740/10/1/11)
Supplement: s1 [file s1 › g_SMoTe_SMoTe_def2-TZVPPD.mol2]

# test
# Created by GaussView 5.0.8
#

#
#

@<TRIPOS>MOLECULE
Molecule Name
6 4
SMALL
NO_CHARGES


@<TRIPOS>ATOM
1 Mo1    -0.8527     4.4291     0.0000 Mo
2 Te2    -1.0363     2.0498     0.0000 Te
3 S3    -2.8303     5.0564     0.0000 S
4 Mo4     1.8092    -2.4628    -0.0000 Mo
5 Te5     1.1346    -4.7509    -0.0000 Te
6 S6    -0.0000    -1.4397    -0.0000 S
@<TRIPOS>BOND
1 1 2 1
2 1 3 1
3 4 5 1
4 4 6 1
