# Supplementary material
Source: MDPI journal article supplement (https://www.mdpi.com/2304-6740/10/1/11)
Supplement: s1 [file s1 › h_SeMoS_SeMoS_def2-TZVPPD.mol2]

# test
# Created by GaussView 5.0.8
#

#
#

@<TRIPOS>MOLECULE
Molecule Name
6 4
SMALL
NO_CHARGES


@<TRIPOS>ATOM
1 Mo1    -1.0431     3.7135     0.0000 Mo
2 Se2    -1.3397     1.5292     0.0000 Se
3 S3    -2.9981     4.4073     0.0000 S
4 Mo4     1.9505    -2.3465    -0.0000 Mo
5 Se5     1.6297    -4.5248    -0.0000 Se
6 S6     0.0000    -1.6300    -0.0000 S
@<TRIPOS>BOND
1 1 2 1
2 1 3 1
3 4 5 1
4 4 6 1
