# Supplementary material
Source: MDPI journal article supplement (https://www.mdpi.com/2304-6740/10/1/11)
Supplement: s1 [file s1 › i_MoS2_dimer_def2-TZVPPD_MP2_geom.mol2]

# test
# Created by GaussView 5.0.8
#

#
#

@<TRIPOS>MOLECULE
Molecule Name
6 4
SMALL
NO_CHARGES


@<TRIPOS>ATOM
1 Mo1    -0.0000     3.1765    -0.5697 Mo
2 S2    -0.0000     1.6653     0.8522 S
3 S3    -0.0000     4.8561     0.6432 S
4 Mo4    -0.0000    -3.1765    -0.5697 Mo
5 S5    -0.0000    -4.8561     0.6432 S
6 S6    -0.0000    -1.6653     0.8522 S
@<TRIPOS>BOND
1 1 2 1
2 1 3 1
3 4 5 1
4 4 6 1
