# Supplementary material
Source: MDPI journal article supplement (https://www.mdpi.com/2304-6740/10/1/11)
Supplement: s1 [file s1 › MoSe2_SCAN_rVV10_geometry.cif]

#======================================================================
# CRYSTAL DATA
#----------------------------------------------------------------------
data_VESTA_phase_1

_chemical_name_common                  'Title of Simulation                   '
_cell_length_a                         3.296080
_cell_length_b                         3.296080
_cell_length_c                         13.181262
_cell_angle_alpha                      90.000000
_cell_angle_beta                       90.000000
_cell_angle_gamma                      119.999969
_cell_volume                           124.017578
_space_group_name_H-M_alt              'P 1'
_space_group_IT_number                 1

loop_
_space_group_symop_operation_xyz
   'x, y, z'

loop_
   _atom_site_label
   _atom_site_occupancy
   _atom_site_fract_x
   _atom_site_fract_y
   _atom_site_fract_z
   _atom_site_adp_type
   _atom_site_U_iso_or_equiv
   _atom_site_type_symbol
   Mo1        1.0     0.666667     0.333333     0.750000    Uiso  ? Mo
   Mo2        1.0     0.333333     0.666667     0.250000    Uiso  ? Mo
   Se1        1.0     0.333333     0.666667     0.875827    Uiso  ? Se
   Se2        1.0     0.333333     0.666667     0.624173    Uiso  ? Se
   Se3        1.0     0.666667     0.333333     0.375827    Uiso  ? Se
   Se4        1.0     0.666667     0.333333     0.124173    Uiso  ? Se
