# Supplementary material
Source: MDPI journal article supplement (https://www.mdpi.com/2304-6740/10/1/11)
Supplement: s1 [file s1 › MoTe2_SCAN_rVV10_geometry.cif]

#======================================================================
# CRYSTAL DATA
#----------------------------------------------------------------------
data_VESTA_phase_1

_chemical_name_common                  'Title of Simulation                   '
_cell_length_a                         3.508064
_cell_length_b                         3.508064
_cell_length_c                         14.197058
_cell_angle_alpha                      90.000000
_cell_angle_beta                       90.000000
_cell_angle_gamma                      119.999985
_cell_volume                           151.308780
_space_group_name_H-M_alt              'P 1'
_space_group_IT_number                 1

loop_
_space_group_symop_operation_xyz
   'x, y, z'

loop_
   _atom_site_label
   _atom_site_occupancy
   _atom_site_fract_x
   _atom_site_fract_y
   _atom_site_fract_z
   _atom_site_adp_type
   _atom_site_U_iso_or_equiv
   _atom_site_type_symbol
   Mo1        1.0     0.666667     0.333333     0.750000    Uiso  ? Mo
   Mo2        1.0     0.333333     0.666667     0.250000    Uiso  ? Mo
   Te1        1.0     0.333333     0.666667     0.876352    Uiso  ? Te
   Te2        1.0     0.333333     0.666667     0.623648    Uiso  ? Te
   Te3        1.0     0.666667     0.333333     0.376352    Uiso  ? Te
   Te4        1.0     0.666667     0.333333     0.123648    Uiso  ? Te
