# Supplementary material
Source: MDPI journal article supplement (https://www.mdpi.com/2304-6740/10/1/11)
Supplement: s1 [file s1 › Ms_MoCh2_Sup Material.pdf]

# The Chalcogen...Chalcogen Bonding in Molybdenum Disulfide, Molybdenum Diselenide and Molybdenum Ditelluride Dimers as Prototypes for a Basic Understanding of the Local Interfacial Chemical Bonding Environment in 2D Layered Transition Metal Dichalcogenides

Pradeep R. Varadwaj <sup>1,2,\*</sup>, Helder M. Marques <sup>1</sup>, Arpita Varadwaj <sup>2</sup>, and Koichi Yamashita<sup>2</sup>

<sup>1</sup> Molecular Sciences Institute, School of Chemistry, University of the Witwatersrand, Johannesburg, 3050 South Africa

<sup>2</sup> Department of Chemical System Engineering, School of Engineering, The University of Tokyo 7-3-1, Tokyo 113-8656, Japan

\* Correspondence: [pradeep@t.okayama-u.ac.jp](mailto:pradeep@t.okayama-u.ac.jp); [pradeep.varadwaj@wits.ac.za](mailto:pradeep.varadwaj@wits.ac.za)

## Supplementary Information

**Table S1:** MP2(Full)/def2-TZVPPD computed uncorrected and BSSE corrected binding energies ( $\Delta E$  and  $\Delta E(\text{BSSE})$  in kcal mol<sup>-1</sup>, respectively), and chalcogen...chalcogen ( $r(\text{Ch}\cdots\text{Ch})$ ) bond distances of the nine dimers of Figure 2.

| Figure 3 | Dimer type                                    | $\Delta E$ | $\Delta E(\text{BSSE})$ | $r(\text{Ch}\cdots\text{Ch})$ /Å |
|----------|-----------------------------------------------|------------|-------------------------|----------------------------------|
| a        | (MoTe <sub>2</sub> ) ... (MoTe <sub>2</sub> ) | -3.79      | -1.98                   | 3.926                            |
| b        | (MoSe <sub>2</sub> ) ... (MoSe <sub>2</sub> ) | -4.10      | -1.70                   | 3.469                            |
| c        | (TeMoSe) ... (SeMoTe)                         | -3.73      | -1.43                   | 3.640                            |
| d        | (TeMoSe) ... (TeMoSe)                         | -3.81      | -1.66                   | 3.737                            |
| e        | (MoTe <sub>2</sub> ) ... (SeMoTe)             | -3.72      | -1.63                   | 3.804                            |
| f        | (MoTe <sub>2</sub> ) ... (TeMoS)              | -3.64      | -1.88                   | 3.958                            |
| g        | (SMoTe) ... (SMoTe)                           | -3.37      | -1.90                   | 3.640                            |
| h        | (SeMoS) ... (SeMoS)                           | -3.48      | -1.87                   | 3.431                            |
| i        | (MoS <sub>2</sub> ) ... (MoS <sub>2</sub> )   | -3.09      | -2.02                   | 3.331                            |

**Table S2:** Some selected relaxed geometries of MoCh<sub>2</sub> (Ch = S, Se, Te) dimers, obtained with MP2(full) in conjunction with the def2-TZPPPD basis set  
Redundant internal coordinates, Gaussian 16 format.

(a) (MoTe<sub>2</sub>)<sub>2</sub> dimer

Mo,0,0.,4.1794504376,0.7873920888  
Te,0,0.,1.9627937244,-0.0728906834  
Te,0,0.,5.6572221132,-1.0726818861  
Mo,0,0.,-4.1794504376,0.7873920888  
Te,0,0.,-5.6572221132,-1.0726818861  
Te,0,0.,-1.9627937244,-0.0728906834

(b) (MoSe<sub>2</sub>)<sub>2</sub> dimer

Mo,0,0.,3.3826081972,0.7949308497  
Se,0,0.,1.7345023727,-0.6691929337  
Se,0,0.,5.1750552903,-0.4839183127  
Mo,0,0.,-3.3826081972,0.7949308497  
Se,0,0.,-5.1750552903,-0.4839183127  
Se,0,0.,-1.7345023727,-0.6691929337

(c) (TeMoSe)...(SeMoTe)

Mo,0,0.,3.9585430441,0.7554494252  
Se,0,0.,1.8201535301,0.2276992541  
Te,0,0.,5.091745793,-1.3413288351  
Mo,0,0.,-3.9585430441,0.7554494252  
Te,0,0.,-5.091745793,-1.3413288351  
Se,0,0.,-1.8201535301,0.2276992541

(d) (TeMoSe)...(TeMoSe)

Mo,0,0.,3.9583743367,0.7956286895  
Se,0,0.,1.912958458,-0.022524056  
Te,0,0.,5.3708019287,-1.1240568137  
Mo,0,0.,-4.07596485,0.7537382472  
Se,0,0.,-5.3288991508,-1.0542601321  
Te,0,0.,-1.8372707226,-0.064886813

(e)(MoTe<sub>2</sub>)...(SeMoTe)

Mo,0,0.,4.2139357568,0.7007840018  
Te,0,0.,1.8452105746,0.4991779411  
Te,0,0.,5.1077070445,-1.5011590543  
Mo,0,0.,-4.1324219906,0.7046434037

Te,0,0.,-5.078572856,-1.4834922432

Se,0,0.,-1.9558585293,0.363685073

(f) (MoTe<sub>2</sub>)...(TeMoS)

Mo,0,0.,4.2755324676,0.7340868573

Te,0,0.,1.9359802577,0.3098185779

Te,0,0.,5.3748651193,-1.3716433711

Mo,0,0.,-4.366639272,0.6528970719

S,0,0.,-5.1993585831,-1.2504085649

Te,0,0.,-2.0203799895,0.2088885509

(g)(SMoTe)...(SMoTe)

Mo,0,0.,3.8762298633,0.8174378551

Te,0,0.,1.7318253967,-0.2295985604

S,0,0.,5.1878583413,-0.7901111067

Mo,0,0.,-3.5115954071,0.7536730103

Te,0,0.,-5.3903073451,-0.7162881805

S,0,0.,-1.8940108491,-0.5514738959

(h) (SeMoS)...(SeMoS)

Mo,0,0.,3.477171836,0.8112124656

Se,0,0.,1.6632878298,-0.4414101703

S,0,0.,4.9802704211,-0.6184061347

Mo,0,0.,-3.2814961034,0.7397195814

Se,0,0.,-5.0790693643,-0.5317925784

S,0,0.,-1.7601646192,-0.6756840415

(i) (MoS<sub>2</sub>)<sub>2</sub> dimer

Mo,0,0.,3.1765115035,0.7589013567

S,0,0.,1.6652551526,-0.6630494987

S,0,0.,4.8560758724,-0.4540322803

Mo,0,0.,-3.1765115035,0.7589013567

S,0,0.,-4.8560758724,-0.4540322803

S,0,0.,-1.6652551526,-0.6630494987

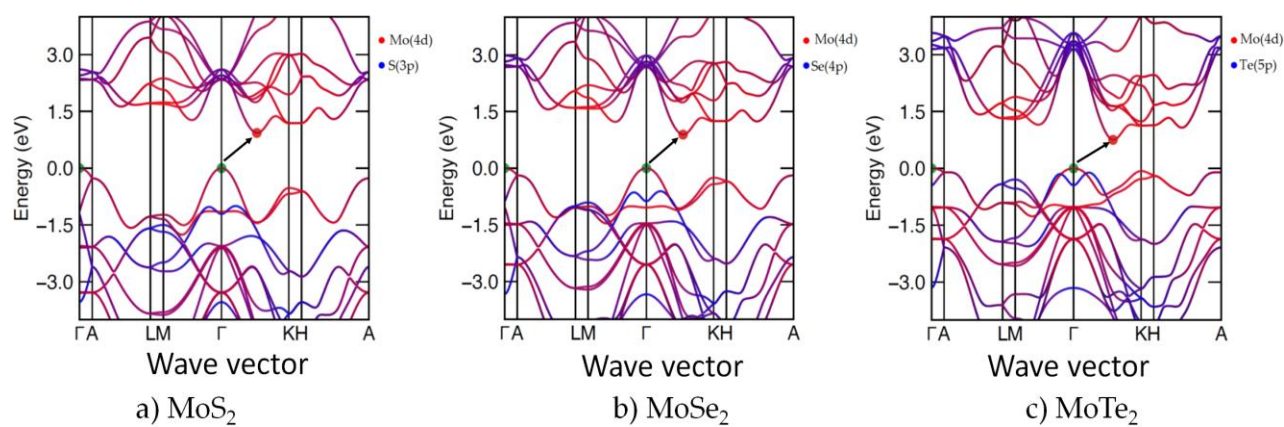

**Figure S1.** The atom/orbital-projected band structures of all the three bulk systems MoCh<sub>2</sub> (Ch = S, Te, Se), obtained using SCAN-*rVV10*. The VBM and CBM are found at  $\Gamma$  and between K- $\Gamma$ , respectively.
